# Supplementary material for: Transcriptional Response of Circadian Clock Genes to an ‘Artificial Light at Night’ Pulse in the Cricket Gryllus bimaculatus
Source: MDPI journal article supplement (doi:10.3390/ijms231911358), 2022-09-26
Supplement: s1 [file s1]

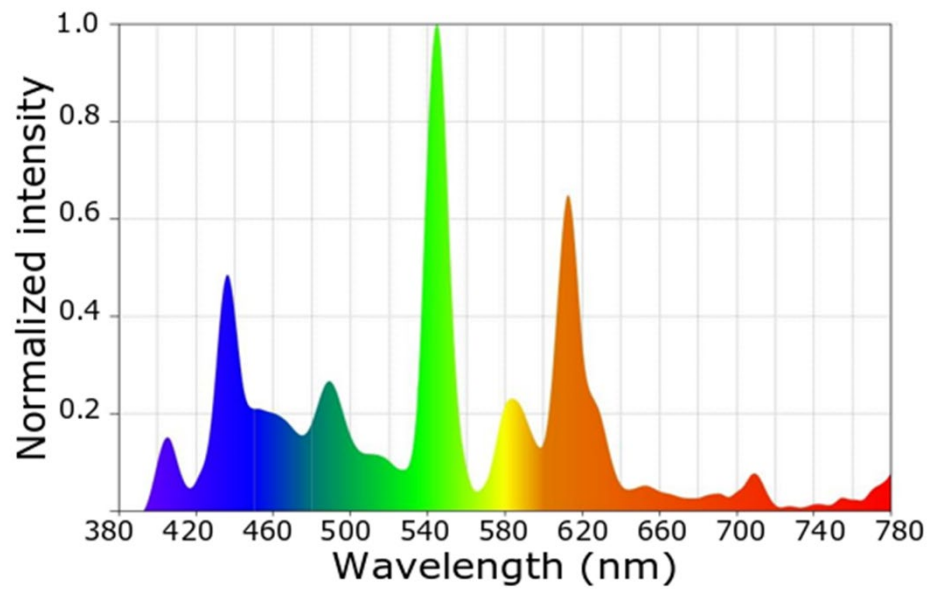

**Figure S1.** Spectrograms of the light bulb used for the acclimation and for the experiment. The light spectrum was recorded using the Sekonic Spectromaster C-700 (North White Plains, NY, USA).
