# Supplementary material for: Transcriptional Response of Circadian Clock Genes to an ‘Artificial Light at Night’ Pulse in the Cricket Gryllus bimaculatus
Source: MDPI journal article supplement (doi:10.3390/ijms231911358), 2022-09-26
Supplement: s1 [file s1]

**Table S1.** Sample sizes of individual male *Gryllus bimaculatus* adult crickets used for each tissue and treatment of the experiment. Each column represents a different gene.

| Tissue             | Treatment | <i>Rpl18a</i> | <i>actin</i> | <i>opLW</i> | <i>cry2</i> | <i>per</i> | <i>c-fosB</i> | <i>cry1</i> |
|--------------------|-----------|---------------|--------------|-------------|-------------|------------|---------------|-------------|
| Brain              | 0lx       | 9             | 9            | 8           | 9           | 8          | 9             | 8           |
|                    | 2lx       | 8             | 8            | 8           | 8           | 8          | 8             | 8           |
|                    | 5lx       | 6             | 6            | 6           | 6           | 6          | 6             | 6           |
|                    | 40lx      | 5             | 5            | 5           | 5           | 3          | 5             | 3           |
| Optic lobe         | 0lx       | 4             | 4            | 4           | 3           | 3          | 4             | 2           |
|                    | 2lx       | 6             | 6            | 6           | 6           | 6          | 6             | 6           |
|                    | 5lx       | 6             | 6            | 6           | 6           | 6          | 6             | 6           |
|                    | 40lx      | 6             | 6            | 6           | 5           | 6          | 6             | 6           |
| Malpighian tubules | 0lx       | 14            | 14           | 13          | 14          | 12         | 13            | 12          |
|                    | 2lx       | 9             | 9            | 8           | 9           | 9          | 9             | 9           |
|                    | 5lx       | 12            | 12           | 10          | 11          | 11         | 11            | 11          |
|                    | 40lx      | 12            | 12           | 12          | 12          | 11         | 12            | 12          |
| Haemolymph         | 0lx       | 5             | 5            | 4           | 5           | 4          | 4             | 3           |
|                    | 2lx       | 5             | 5            | 5           | 5           | 4          | 5             | 4           |
|                    | 5lx       | 5             | 5            | 4           | 4           | 4          | 4             | 4           |
|                    | 40lx      | 7             | 7            | 5           | 6           | 6          | 6             | 6           |
