# Supplementary material for: Transcriptional Response of Circadian Clock Genes to an ‘Artificial Light at Night’ Pulse in the Cricket Gryllus bimaculatus
Source: MDPI journal article supplement (doi:10.3390/ijms231911358), 2022-09-26
Supplement: s1 [file s1]

**Table S2.** Sequences of primers used for qPCR of circadian gene expression in adult male *Gryllus bimaculatus* crickets exposed to a pulse of one of four different ALAN intensities.

| Gene          | Forward                 | Reverse               |
|---------------|-------------------------|-----------------------|
| <i>Rpl18a</i> | GCTCCGGATTACATCGTTGC    | GCCAAATGCCGAAGTTCTTG  |
| <i>actin</i>  | CCTGGCATTGCTGATAGGAT    | CCTGCTTGGAGATCCACATT  |
| <i>opLW</i>   | CGCTCCTACATCCTCGTCTACTC | CGTTCATCTTCTTGGCTTGCT |
| <i>cry2</i>   | TTCGACACGGAAGGTCTGCT    | CGGCCAAATGATGCTACCC   |
| <i>per</i>    | GTGGAGGAGAACCGGTGTAA    | CCAGGTTCTCTTCAGCAAG   |
| <i>c-fosB</i> | GTTGCCGTCTGAATGGAAAT    | GGAGGTTTTGCACCACTTGT  |
| <i>cry1</i>   | GGGGCGAATACATCAAAAGA    | CGACAATGAGGTGGAGGATT  |
